# Supplementary material
Source: HighWire-hosted journal article supplement (https://www.cmaj.ca/highwire/filestream/59340/field_highwire_adjunct_files/2/141372-res-3-at.pdf)
Supplement: 141372-res-3-at.pdf [file 141372-res-3-at.pdf]

**Appendix 3 (part 1 of 2): Baseline characteristics of patients with stable ischemic heart disease, by hospital revascularization ratio\***

| Characteristic                                         | Hospital revascularization ratio; % of patients† |                         |                            |                          | p value‡ |
|--------------------------------------------------------|--------------------------------------------------|-------------------------|----------------------------|--------------------------|----------|
|                                                        | All<br>n = 39 131                                | Low ratio<br>n = 12 576 | Medium ratio<br>n = 12 370 | High ratio<br>n = 14 185 |          |
| <b>Patient</b>                                         |                                                  |                         |                            |                          |          |
| <i>Demographic</i>                                     |                                                  |                         |                            |                          |          |
| Age, yr, mean ± SD                                     | 66.0 ± 10.3                                      | 65.9 ± 10.4             | 65.7 ± 10.1                | 66.4 ± 10.4              | < 0.001  |
| Male sex                                               | 75.3                                             | 75.8                    | 75.3                       | 74.7                     | 0.1      |
| Rural                                                  | 14.5                                             | 13.3                    | 16.2                       | 14.0                     | < 0.001  |
| Income quintile                                        |                                                  |                         |                            |                          | < 0.001  |
| 1 (lowest)                                             | 18.6                                             | 16.7                    | 19.6                       | 19.4                     |          |
| 2                                                      | 20.4                                             | 19.4                    | 20.4                       | 21.5                     |          |
| 3                                                      | 20.2                                             | 21.2                    | 20.5                       | 19.1                     |          |
| 4                                                      | 20.7                                             | 21.1                    | 20.7                       | 20.3                     |          |
| 5 (highest)                                            | 20.1                                             | 21.7                    | 18.8                       | 19.7                     |          |
| <i>Medical comorbidities</i>                           |                                                  |                         |                            |                          |          |
| Peripheral vascular disease                            | 9.4                                              | 9.0                     | 9.1                        | 10.0                     | 0.010    |
| Prior myocardial infarction                            | 28.1                                             | 30.3                    | 29.9                       | 24.7                     | < 0.001  |
| COPD                                                   | 6.9                                              | 7.1                     | 7.0                        | 6.6                      | 0.2      |
| Charlson comorbidity score, mean ± SD                  | 0.9 ± 1.3                                        | 0.8 ± 1.4               | 0.9 ± 1.3                  | 0.9 ± 1.3                | < 0.001  |
| <i>Cardiac risk factors</i>                            |                                                  |                         |                            |                          |          |
| Diabetes                                               | 44.0                                             | 44.8                    | 45.0                       | 42.3                     | < 0.001  |
| Hypertension                                           | 86.7                                             | 87.1                    | 86.8                       | 86.3                     | 0.1      |
| Hyperlipidemia                                         | 80.8                                             | 79.4                    | 81.3                       | 81.7                     | < 0.001  |
| History of smoking                                     | 31.6                                             | 34.6                    | 34.1                       | 26.6                     | < 0.001  |
| <i>Cardiac status/testing</i>                          |                                                  |                         |                            |                          |          |
| Native stenosis§                                       |                                                  |                         |                            |                          |          |
| Left main coronary artery                              | 13.0                                             | 13.1                    | 12.1                       | 13.8                     | < 0.001  |
| Proximal left anterior descending coronary artery      | 33.2                                             | 30.6                    | 35.8                       | 33.1                     | < 0.001  |
| Mid or distal left anterior descending coronary artery | 49.6                                             | 53.6                    | 41.4                       | 53.3                     | < 0.001  |
| Circumflex artery                                      | 51.5                                             | 53.5                    | 49.4                       | 51.6                     | < 0.001  |
| Right coronary artery                                  | 60.8                                             | 60.6                    | 60.2                       | 61.4                     | 0.1      |
| Prior CABG                                             |                                                  |                         |                            |                          |          |
| Yes                                                    | 18.0                                             | 18.8                    | 18.3                       | 17.0                     |          |
| No                                                     | 81.9                                             | 81.2                    | 81.4                       | 83.0                     |          |
| Unknown                                                | 0.1                                              | 0.0                     | 0.3                        | 0.0                      |          |
| Vessel disease                                         |                                                  |                         |                            |                          |          |
| 1 vessel                                               | 38.9                                             | 38.0                    | 40.0                       | 38.7                     | < 0.001  |
| 2 vessels                                              | 25.8                                             | 25.8                    | 26.5                       | 25.3                     |          |
| 3 vessels                                              | 34.5                                             | 35.7                    | 31.9                       | 35.7                     |          |
| Missing data                                           | 0.8                                              | 0.5                     | 1.6                        | 0.3                      |          |
| Left ventricular function                              |                                                  |                         |                            |                          |          |
| ≤ 34%                                                  | 5.4                                              | 6.3                     | 5.3                        | 4.7                      | < 0.001  |
| 35%–49%                                                | 12.9                                             | 15.2                    | 13.5                       | 10.5                     |          |
| ≥ 50%                                                  | 48.6                                             | 52.9                    | 53.4                       | 40.7                     |          |
| Not done                                               | 33.0                                             | 25.7                    | 27.8                       | 44.1                     |          |

**Appendix 3 (part 2 of 2): Baseline characteristics of patients with stable ischemic heart disease, by hospital revascularization ratio\***

| Characteristic                                 | Hospital revascularization ratio; % of patients† |                         |                            |                          | p value‡ |
|------------------------------------------------|--------------------------------------------------|-------------------------|----------------------------|--------------------------|----------|
|                                                | All<br>n = 39 131                                | Low ratio<br>n = 12 576 | Medium ratio<br>n = 12 370 | High ratio<br>n = 14 185 |          |
| Exercise ECG risk                              |                                                  |                         |                            |                          | < 0.001  |
| High risk                                      | 27.7                                             | 25.0                    | 29.3                       | 28.6                     |          |
| Low risk                                       | 22.4                                             | 28.0                    | 23.3                       | 16.8                     |          |
| Uninterpretable                                | 4.9                                              | 5.4                     | 4.9                        | 4.4                      |          |
| Not done                                       | 45.0                                             | 41.6                    | 42.5                       | 50.2                     |          |
| Functional imaging risk                        |                                                  |                         |                            |                          | < 0.001  |
| High risk                                      | 32.0                                             | 31.0                    | 34.6                       | 30.8                     |          |
| Low risk                                       | 23.0                                             | 27.4                    | 23.1                       | 19.1                     |          |
| Not done                                       | 44.9                                             | 41.6                    | 42.3                       | 50.1                     |          |
| CCS class                                      |                                                  |                         |                            |                          | < 0.001  |
| 0                                              | 16.5                                             | 20.5                    | 17.6                       | 12.0                     |          |
| 1                                              | 14.0                                             | 19.8                    | 10.8                       | 11.6                     |          |
| 2                                              | 38.3                                             | 33.6                    | 41.6                       | 39.4                     |          |
| 3                                              | 28.5                                             | 24.2                    | 28.0                       | 32.7                     |          |
| 4                                              | 2.8                                              | 1.9                     | 1.9                        | 4.3                      |          |
| <b>Physician¶</b>                              |                                                  |                         |                            |                          |          |
| Age, yr, mean ± SD                             | 48.3 ± 9.1                                       | 48.6 ± 8.0              | 48.9 ± 9.6                 | 47.42 ± 9.4              | < 0.001  |
| Sex                                            |                                                  |                         |                            |                          | < 0.001  |
| Female                                         | 3.7                                              | 3.7                     | 1.9                        | 5.3                      |          |
| Male                                           | 94.7                                             | 94.9                    | 96.4                       | 93.1                     |          |
| Unknown                                        | 1.5                                              | 1.4                     | 1.6                        | 1.5                      |          |
| Years since graduation, mean ± SD              | 23.4 ± 9.3                                       | 23.4 ± 8.2              | 24.2 ± 10.0                | 22.6 ± 9.5               | < 0.001  |
| Total consultations billed per year, mean ± SD | 856.5 ± 424.7                                    | 946.5 ± 478.9           | 824.3 ± 328.3              | 804.7 ± 435.2            | < 0.001  |
| Total visits billed per year, mean ± SD        | 2613.9 ± 1730.7                                  | 3066.3 ± 2104.1         | 2853.4 ± 1503.1            | 2003.8 ± 1327.4          | < 0.001  |
| <b>Hospital</b>                                |                                                  |                         |                            |                          |          |
| Annual catheterization volume, mean ± SD       | 4092.3 ± 1696.4                                  | 3875.2 ± 1487.7         | 3494.9 ± 1012.6            | 4805.8 ± 2054.4          | < 0.001  |
| Hospital type                                  |                                                  |                         |                            |                          | < 0.001  |
| Catheterization only                           | 13.2                                             | 12.6                    | 12.2                       | 14.6                     |          |
| PCI and catheterization only                   | 6.1                                              | 18.8                    | 0.0                        | 0.0                      |          |
| CABG, PCI and catheterization                  | 80.8                                             | 68.6                    | 87.8                       | 85.4                     |          |

Note: CABG = coronary artery bypass grafting, CCS = Canadian Cardiovascular Society, COPD = chronic obstructive pulmonary disease, ECG = electrocardiogram, PCI = percutaneous coronary intervention, SD = standard deviation.

\*Revascularization-to-medical therapy ratio.

†Unless stated otherwise.

‡We assessed differences in baseline characteristics between initial treatment strategy and hospital revascularization ratio strata using the  $\chi^2$  test for categorical variables and analysis of variance for continuous variables.

§Significant stenosis  $\geq 70\%$  ( $\geq 50\%$  in left main coronary artery).

¶Procedural physician.
